# Supplementary material for: Novel compound heterozygous variant of BSCL2 identified by whole exome sequencing and multiplex ligation-dependent probe amplification in an infant with congenital generalized lipodystrophy
Source: PubMed Central journal article supplement — Mol Med Rep. 2020 Mar 23;21(6):2296–302. doi: 10.3892/mmr.2020.11036 (PMC7185175; doi:10.3892/mmr.2020.11036), 2020-03-23
Supplement: Supplementary_Data.pdf [file Supplementary_Data.pdf]

Table SI. Multiplex ligation-dependent probe amplification probe sequences of the *BSCL2* gene.

| Target gene and Ex or In | Probe sequence (5'-3')                                                    | GC (%) | Tm (°C) | Target sequence length (bp) | Total amplicon size (bp) |
|--------------------------|---------------------------------------------------------------------------|--------|---------|-----------------------------|--------------------------|
| BSCL2 Ex1                | F:<br>GGGTTCCCTAAGGGTTGGATCAGGAAGATGTCTACAGAA<br>AAGGTAGACCAAAGG          | 47     | 84.7    | 62                          | 104                      |
|                          | R:<br>AGGAAGCTGGGGAAAAAGAGGTGTGCTCTAGATTGGATC<br>TTGCTGGCAC               |        |         |                             |                          |
| BSCL2 Ex2                | F:<br>GGGTTCCCTAAGGGTTGGACCTTTTGCTCTGGGTGTCTGT<br>CTTCCTCTATGGCTCCTTCT    | 53     | 89.4    | 78                          | 120                      |
|                          | R:<br>ACTATTCCTATATGCCGACAGTCAGCCACCTCAGCCCTCT<br>AGATTGGATCTTGCTGGCAC    |        |         |                             |                          |
| BSCL2 In2                | F:<br>GGGTTCCCTAAGGGTTGGATGGAATTTACATTTTATCAA<br>GCTCCTTAAGTCTTTAGAAACACT | 38     | 81.5    | 90                          | 132                      |
|                          | R:<br>GAAGTATGCAACTATTTAAGTATCTCTAGATTCCCATCTA                            |        |         |                             |                          |

|           |                                                                                  |    |      |    |     |
|-----------|----------------------------------------------------------------------------------|----|------|----|-----|
|           | AGAACTCTAGATTGGATCTTGCTGGCAC                                                     |    |      |    |     |
| BSCL2 Ex3 | F:<br>GGGTTCCCTAAGGGTTGGATTTAGGACCGACTGTGATTCC<br>TCCACCACCTCACTCTGC             | 55 | 90.2 | 76 | 118 |
|           | R:<br>TCCTTCCCTGTTGCCAATGTCTCGCTGACTAAGGGTGTCT<br>AGATTGGATCTTGCTGGCAC           | 52 | 88.7 |    |     |
| BSCL2 In3 | F:<br>GGGTTCCCTAAGGGTTGGATGCTCTCAATGAGCTCACAGC<br>GTTGATGGAAAACCTATACATTGCATATGT | 45 | 87   | 96 | 138 |
|           | R:<br>TTGCATACATTTAAGTAGTAACTGTAAAATGCGGATTCT<br>GGCCAGTCTAGATTGGATCTTGCTGGCAC   | 41 | 83.8 |    |     |
| BSCL2 Ex4 | F:<br>GGGTTCCCTAAGGGTTGGATACCTTAGAGCTTGAGCTGCC<br>AGAGTCCCCTGTGAATCAAGATTTG      | 51 | 88.9 | 82 | 124 |
|           | R:<br>GGCATGTTCTTGGTCACCATTTCCCTGCTACACCAGATCTA<br>GATTGGATCTTGCTGGCAC           | 49 | 87.7 |    |     |
| BSCL2 Ex5 | F:                                                                               | 52 | 87   | 73 | 115 |

|            |                                                                     |    |       |    |     |
|------------|---------------------------------------------------------------------|----|-------|----|-----|
|            | GGGTTCCCTAAGGGTTGGAAGGTGGA ACTCTACGCAGAC<br>TATAGAGAGAACTCGGTGA     |    |       |    |     |
|            | R:<br>GTGAGGTGAACGAGCTTTATGACTAGGAGATAGCTCTAG<br>ATTGGATCTTGCTGGCAC | 47 | 84    |    |     |
| BSCL2 Ex6  | F:<br>GGGTTCCCTAAGGGTTGGACAGTACGTGCCGACCACTGG<br>AGCGATCATTGAGA     | 57 | 90.3  | 68 | 110 |
|            | R:<br>TCCACAGCAAGCGCATCCAGCTGTATGGAGCCTATCTAG<br>ATTGGATCTTGCTGGCAC | 53 | 88.3  |    |     |
| BSCL2 Ex7  | F:<br>GGGTTCCCTAAGGGTTGGATCCCTACTTCCCTGCCTCAGAT<br>ACCTGCTATAC      | 53 | 85.3  | 64 | 106 |
|            | R:<br>AACTTCCCGATGACCTGCGCCTTCATAGGTGTTCTAGATT<br>GGATCTTGCTGGCAC   | 51 | 87.11 |    |     |
| BSCL2 Ex10 | F:<br>GGGTTCCCTAAGGGTTGGACATTCCCCTTTTGGCTGCAGA<br>GGGTCAGCTGTCCGAG  | 59 | 92.4  | 71 | 113 |

|            |                                                                     |    |      |    |     |
|------------|---------------------------------------------------------------------|----|------|----|-----|
|            | R:<br>GAGGAGAAACCAGATCAGCAGCCCCTGAGCGGAGTCTAG<br>ATTGGATCTTGCTGGCAC | 56 | 90.4 |    |     |
| BSCL2 Ex11 | F:<br>GGGTTCCCTAAGGGTTGGAAGGTTTCAGGCTCCTGGGAAG<br>ATGCAGCT          | 57 | 88.9 | 58 | 100 |
|            | R:<br>TTGCTGACGGAGGCCAACCTGCCTGCTCCTTCTAGATTGG<br>ATCTTGCTGGCAC     | 57 | 90.1 |    |     |

BSCL2, Berardinelli-Seip congenital lipodystrophy 2; Ex, exon; In, intron; F, forward; R, reverse.
